# Supplementary material for: DoseTAIlor: A Web-Based Platform for Personalised Tacrolimus Dose Optimisation Across Multi-Centre Populations Using Interpretable AI
Source: Research Square preprint supplement (doi:10.21203/rs.3.rs-5907999/v1), 2025-02-13
Supplement: Supplementary file 1 [file 1f9dea13541d4b1fc1fb6853.docx]

DoseTAIlor: A Web-Based Platform for Personalised Tacrolimus Dose Optimisation Across Multi-Centre Populations Using Interpretable AI

Youssef Abdalla1, Laura Gongas2, Brais Muñiz Castro3, Luis Ramudo Cela4, Francisco Suárez5, Mine Orlu1, Luis Margusino-Framiñán4*, Abdul W. Basit1,6*, David Shorthouse1*, Alvaro Goyanes1,6,7

1Department of Pharmaceutics, UCL School of Pharmacy, University College London, London, UK

2 Department of Computer Science, University College London, London, UK

3 IRLab, CITIC Research Center, University of A Coruña

4Pharmacy Service, Research Group of Hospital Pharmacy, Biomedical Research Institute A Coruña, A Coruña University Hospital, Sergas, University of A Coruña

5 Digestive Service, A Coruña University Hospital, Spain, Biomedical Research Institute A Coruña, A Coruña University Hospital, Sergas, University of A Coruña

6FABRX Artificial Intelligence, Carretera de Escairón, 14, Currelos (O Saviñao), Spain

7Departamento de Farmacología, Farmacia y Tecnología Farmacéutica, I+D Farma (GI-1645), Facultad de Farmacia, Instituto de Materiales and Health Research Institute of Santiago de Compostela (IDIS), Universidade de Santiago de Compostela, Santiago de Compostela, Spain

|  | MIMIC-IV Data (%)  *N=1,666* | CHUAC Data (%)  *N=108* |
| --- | --- | --- |
| Gender | | |
| Female | 36.03 | 29.59 |
| Male | 63.97 | 70.41 |
| Race | | |
| Asian | 5.71 | 0.00 |
| Black | 16.29 | 0.00 |
| Latin | 8.97 | 0.00 |
| White | 63.99 | 100.00 |
| Other | 5.05 | 0.00 |
| Care setting | | |
| Home | 43.65 | 30.83 |
| Hospital | 50.34 | 44.17 |
| ICU | 6.01 | 25.00 |

**Table S1:** Patient demographic information, presented as percentages for different categorical variables.

|  | MIMIC-IV Data  *N=77,723* | CHUAC Data  *N=2,025* |
| --- | --- | --- |
| Age (years) | 56.44 (12.05) | 59.17 (7.79) |
| Height (cm) | 170.12 (10.21) | 167.08 (8.66) |
| Weight (kg) | 78.92 (18.92) | 77.42 (16.50) |
| Hematocrit (%) | 31.95 (6.40) | 33.15 (5.90) |
| Hemoglobin (g/dL) | 10.37 (2.09) | 11.14 (2.02) |
| Renal Function | | |
| Creatinine (mg/dL) | 1.83 (1.50) | 1.08 (0.85) |
| Sodium (mEq/L) | 138.40 (3.78) | 139.98 (3.51) |
| Potassium (mEq/L) | 4.45 (0.61) | 4.44 (1.35) |
| Hepatic Function | | |
| AST (IU/L) | 43.82 (202.44) | 81.24 (253.73) |
| ALT (IU/L) | 49.60 (132.67) | 161.41 (346.76) |
| Albumin (g/dL) | 3.74 (0.70) | 3.49 (0.63) |
| Bilirubin (mg/dL) | 1.22 (3.59) | 3.55 (5.62) |
| Tacrolimus | | |
| TAC Level (ng/mL) | 7.95 (3.73) | 7.99 (4.29) |
| Dose (mg) | 2.36 (2.00) | 6.80 (4.49) |
| Level-Dose time difference (days) | 46.78 (82.16) | 23.36 (31.58) |
| Treatment Duration (days) | 607.13 (921.02) | 128.81 (168.57) |

**Table S2:** Continuous variables for patients, presented as mean (standard deviation).

|  | MIMIC-IV Data (%)  *N=77,723* | CHUAC Data (%)  *N=2,025* |
| --- | --- | --- |
| Formulation | | |
| Accord | 9.75 | 0.00 |
| Adoport | 58.11 | 0.00 |
| Advagraf | 0.00 | 1.52 |
| American Health | 0.37 | 0.00 |
| Dr Reddy's | 2.80 | 0.00 |
| Envarsus | 0.28 | 38.42 |
| Prograf | 28.69 | 23.47 |
| Solution | 0.00 | 36.59 |
| Route | | |
| Oral | 98.70 | 100.00 |
| Sublingual | 1.30 | 0.00 |
| Frequency | | |
| Once daily | 13.15 | 75.12 |
| Twice daily | 86.79 | 24.88 |
| Three times daily | 0.06 | 0.00 |
| Four times daily | 0.01 | 0.00 |

**Table S3:** Tacrolimus administration information, presented as percentages for different categorical variables.

|  | MIMIC-IV Data (%)  *N=77,723* | CHUAC Data (%)  *N=2,025* |
| --- | --- | --- |
| P-gp inducers | | |
| Yes | 0.17 | 0.00 |
| No | 99.83 | 100.00 |
| P-gp inhibitors | | |
| Yes | 9.08 | 0.05 |
| No | 90.92 | 99.95 |
| CYP3A4/5 inducers | | |
| Yes | 1.01 | 86.19 |
| No | 98.99 | 13.81 |
| CYP3A4/5 inhibitors | | |
| Yes | 16.27 | 1.10 |
| No | 83.73 | 98.90 |

**Table S4:** Concomitant drug information, presented as percentages of patients taking medications which are P-glycoprotein (P-gp) or Cytochrome P450 3A4/5 (CYP3A4/5) inhibitors or inducers.

| Metric | MIMIC-IV data | CHUAC Data |
| --- | --- | --- |
| KS Complement | 0.85 | 0.87 |
| TV Complement | 0.85 | 0.48 |
| KL Divergence | 0.83 | 0.67 |

**Table S5:** Evaluation of synthetic data quality using three metrics: the Kolmogorov-Smirnov statistic (KS Test) for continuous columns, the Total Variation Distance test (TV Test) for discrete columns - both ranging from 0 to 1, with 1 indicating perfect similarity - and the Kullback-Leibler (KL) divergence, which measures the divergence between two probability distributions; a lower score indicates greater similarity.


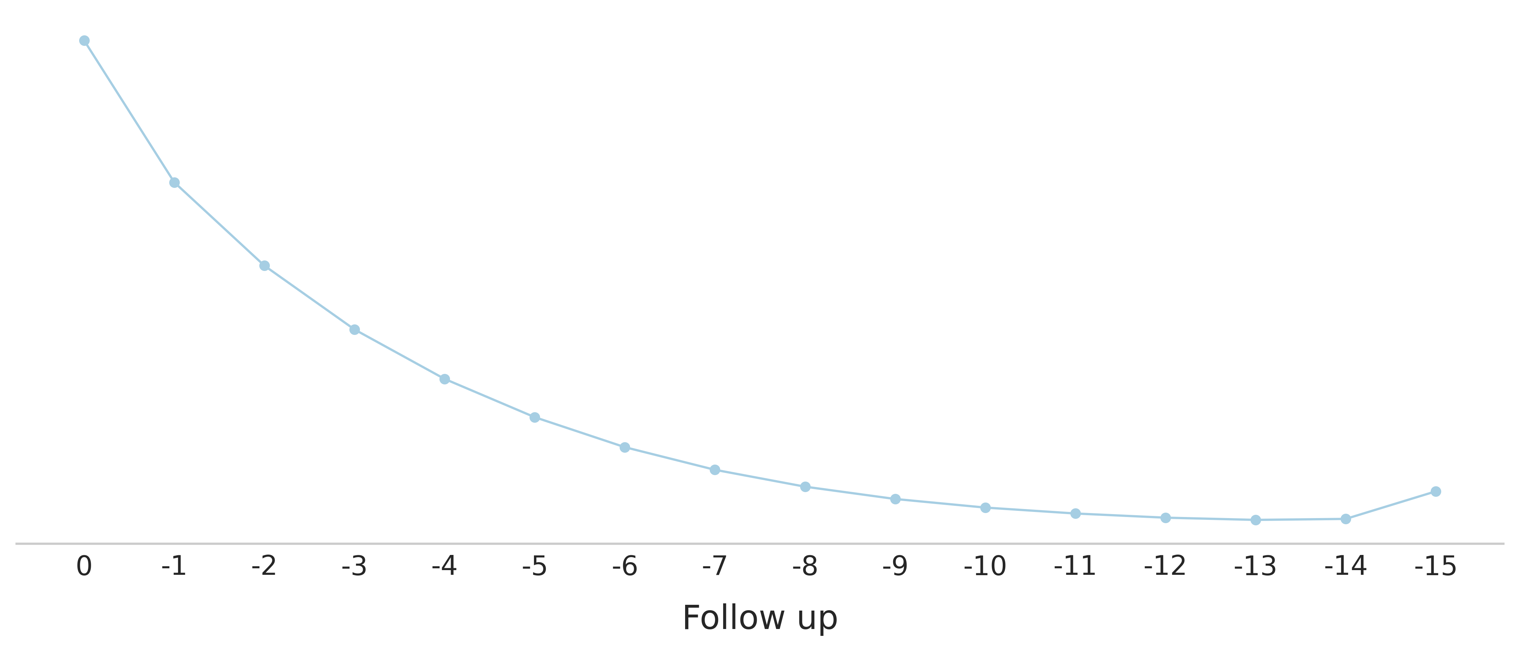


**Figure S1:** Time-step feature attention for TimeLSTM, with the x-axis representing the follow-ups, starting from 0 (the prediction time) across the entire time window analysed by the model.

|  | Tested on real MIMIC-IV data | | Tested on real CHUAC Data | |
| --- | --- | --- | --- | --- |
| **RMSE** | **MAE** | **RMSE** | **MAE** |
| Single-Domain Learning – trained on synthetic and real MIMIC-IV data | | | | |
| LASSO | 3.02(0.11) | 2.33(0.04) | 3.70 | 2.81 |
| Ridge | 3.02(0.11) | 2.13(0.05) | 3.71 | 2.82 |
| ElasticNet | 3.18(0.09) | 2.33(0.04) | 3.83 | 2.95 |
| XGBoost | 3.02(0.10) | 2.23(0.05) | 3.70 | 2.75 |
| LightGBM | 3.02(0.10) | 2.12(0.04) | 3.70 | 2.74 |
| Extra Trees | 3.03(0.10) | 2.14(0.04) | 3.70 | 2.69 |
| TabNet | 3.03(0.03) | 2.14(0.03) | 3.64 | 2.60 |
| Single-Domain Learning - trained on synthetic and real CHUAC data | | | | |
| LASSO | 3.18 | 2.16 | 3.57(0.20) | 2.74(0.08) |
| Ridge | 4.67 | 2.96 | 3.58(0.20) | 2.73(0.08) |
| ElasticNet | 3.38 | 2.35 | 3.74(0.22) | 2.92(0.09) |
| XGBoost | 3.19 | 2.19 | 3.66(0.29) | 2.48(0.28) |
| LightGBM | 3.16 | 2.20 | 3.69(0.27) | 2.61(0.18) |
| Extra Trees | 3.05 | 2.08 | 3.66(0.31) | 2.52(0.18) |
| TabNet | 3.66 | 2.78 | 10.46(1.27) | 8.49(1.46) |
| Pooled Learning – trained on both datasets (synthetic and real data) | | | | |
| LASSO | 3.02(0.11) | 2.11(0.05) | 3.62(0.20) | 2.73(0.16) |
| Ridge | 3.02(0.11) | 2.11(0.05) | 3.59(0.22) | 2.64(0.20) |
| ElasticNet | 3.17(0.09) | 2.31(0.03) | 3.83(0.23) | 2.94(0.018) |
| XGBoost | 3.26(0.53) | 2.34(0.50) | 3.99(0.54) | 2.95(0.54) |
| LightGBM | 3.02(0.10) | 2.11(0.05) | 3.67(0.30) | 2.68(0.19) |
| Extra Trees | 3.43(0.31) | 2.53(0.28) | 4.02(0.31) | 2.93(0.21) |
| TabNet | 3.36(0.32) | 2.36(0.27) | 4.12(0.39) | 2.90(0.29) |

**Table S6:** Model performance when trained on synthetic and real data combined. Presented as mean (standard deviation).


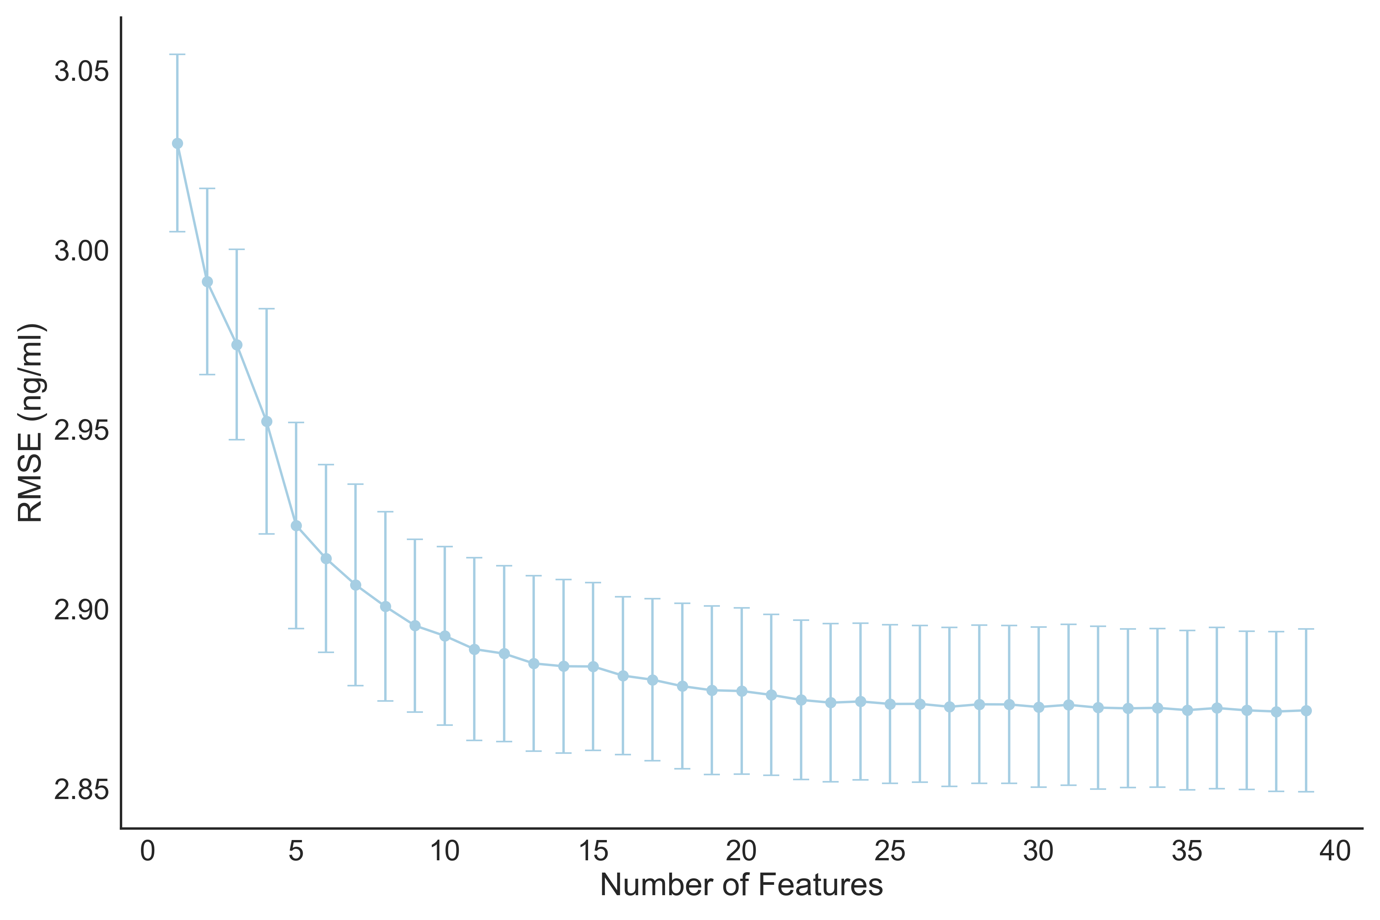


**Figure S2:** RMSE with a reduced number of features in XGBoost following recursive feature elimination.

|  | MIMIC-IV data | | CHUAC Data | |
| --- | --- | --- | --- | --- |
| **RMSE** | **MAE** | **RMSE** | **MAE** |
| Single Domain – MIMIC-IV | 2.89(0.10) | 1.98(0.04) | 4.05 | 3.11 |
| Single Domain – CHUAC | 3.20 | 2.15 | 3.18(0.13) | 2.49(0.16) |
| Pooled Learning | 2.90(0.10) | 1.90(0.02) | 3.42(0.23) | 2.20(0.06) |

**Table S7:** XGBoost performance measured using nested cross-validation, following removal of labs and formulation information.

|  | Hyperparameter | Search Space |
| --- | --- | --- |
| LASSO | alpha | [1e-4, 1] |
| Ridge | alpha | [1e-4, 1] |
| ElasticNet | l1_ratio | [0, 1] |
| XGBoost | n_estimators | [100, 3000] |
| max_depth | [1, 20] |
| learning_rate | [0.0001, 0.5] |
| min_child_weight | [1, 30] |
| subsample | [0, 1] |
| colsample_bytree | [0, 1] |
| LightGBM | max_depth | [1, 20] |
| num_leaves | [2, 1000] |
| min_data_in_leaf | [100, 10000] |
| feature_fraction | [0, 1] |
| bagging_fraction | [0, 1] |
| learning_rate | [0.0001, 0.5] |
| Extra Trees | n_estimators | [100, 3000] |
| max_features | [0, 1] |
| min_samples_leaf | [0, 1] |
| max_depth | [1, 20] |
| TabNet | n_d | [8, 64] |
| n_a | [8, 64] |
| n_steps | [3, 10] |
| gamma | [1, 2] |
| lambda_sparse | [1e-6, 1e-3] |
| momentum | [0.01, 0.4] |
| learning_rate | [1e-5, 1e-1] |
| scheduler_gamma | [0.1, 0.9] |
| virtual_batch_size | [128, 2048] |
| LSTM | window_size | [3, 20] |
| hidden_size | [16, 128] |
| num_layers | [2, 5] |
| learning_rate | [1e-5, 1e-1] |
| dropout | [0, 0.5] |
| Attention | [True, False] |

**Table S8:** Model hyperparameter search space.
